# Supplementary material for: Influenza-like illness and antimicrobial prescribing in Australian general practice from 2015 to 2017: a national longitudinal study using the MedicineInsight dataset
Source: PubMed Central journal article supplement — BMJ Open. 2019 May 1;9(4):e026396. doi: 10.1136/bmjopen-2018-026396 (PMC6502062; doi:10.1136/bmjopen-2018-026396), 2019-05-01

Supplementary Figure 1. Flowchart of the selection of encounters included in the study. Australia, 2015-2017.

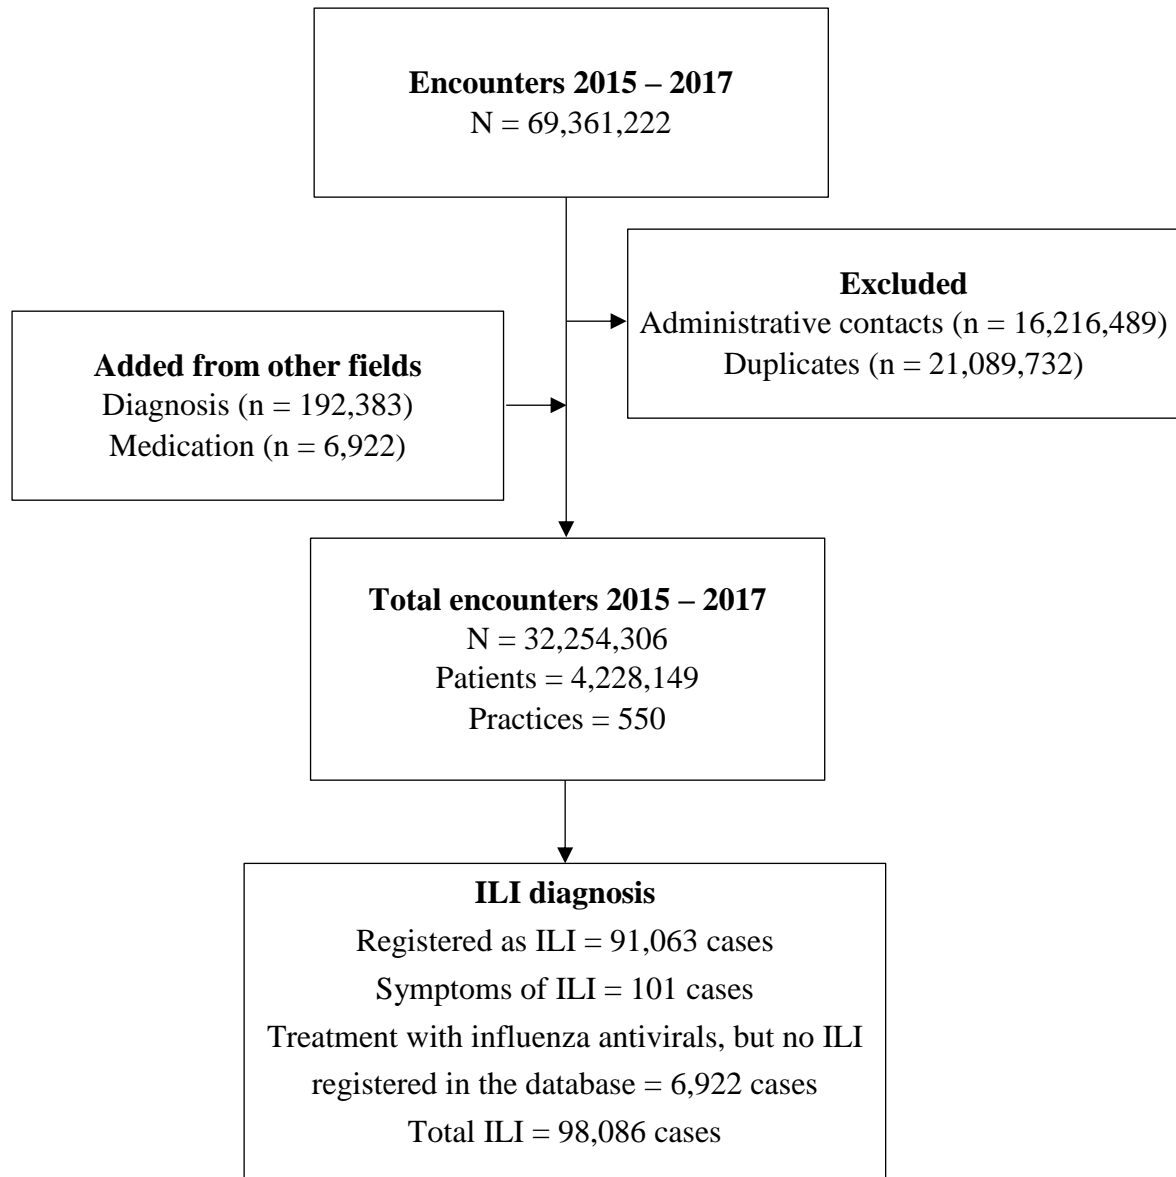

Supplement: bmjopen-2018-026396supp001.pdf [file bmjopen-2018-026396supp001.pdf]
